# Supplementary material
Source: PubMed Central journal article supplement (PMC3009892)
Supplement: supp_M110.123331_jbc.M110.123331-1.pdf [file supp_M110.123331_jbc.M110.123331-1.pdf]

# Supplemental Material for

## THE V-MYC-INDUCED Q83 LIPOCALIN IS A SIDEROCALIN

Nicolas Coudeville, Leonhard Geist, Matthias Hötzing, Markus Hartl,  
Georg Kontaxis, Klaus Bister and Robert Konrat.

**Supplemental Table S1.** Primers used for site directed mutagenesis.

**Supplemental Data S2.** Doubly  $^{15}\text{N}/^{13}\text{C}$ -filtered  $^1\text{H}$ - $^1\text{H}$  NOESY experiment

**Supplemental Table S3.** List of the Q83- $[\text{Ga}^{\text{III}}(\text{Ent})]^{3-}$  intermolecular contacts

**Supplemental Figure S4.** Ionic strength dependency of Q83 affinity for  $[\text{Fe}^{\text{III}}(\text{Ent})]^{3-}$

**Supplemental Table S1.** List of primers used for site directed mutagenesis.

| <b>Mutation</b> | <b>Primers</b>                                                                                                           |
|-----------------|--------------------------------------------------------------------------------------------------------------------------|
| K83A            | Sense: 5'-CTCAGAGGAAGCCAAGAAAGCGGTGGAGGTGCTGGACACTGAC-3'<br>Antisense: 5'-GTCAGTGTCCAGCACCTCCACCGCTTTCTTGGCTTCCTCTGAG-3' |
| R102A           | Sense: 5'-CAGTAATCTATGCAACTGCGGTGAAGGACGGAAGGACCC-3'<br>Antisense: 5'-GGGTCCTTCGGTCCTTCACCGCAGTTGCATAGACTG-3'            |
| R113A           | Sense: 5'-GCTGGACACTGACTTCAAGAGCTATGC-3'<br>Antisense: 5'-GCTGTAGAGCGCCATCATGTGCAGGGTCC-3'                               |

## Supplemental Data S2. Doubly $^{15}\text{N}/^{13}\text{C}$ -filtered $^1\text{H}$ - $^1\text{H}$ NOESY experiment.

In order to measure intermolecular NOE correlation between Q83 and  $[\text{Ga}^{\text{III}}(\text{Ent})]^{3-}$ , we designed a new doubly  $^{15}\text{N}/^{13}\text{C}$ -filtered  $^1\text{H}$ - $^1\text{H}$  NOESY experiment. This experiment is based on already described methodologies used for the simultaneous observation of intramolecular and intermolecular NOEs between an unlabeled ligand and a  $^{13}\text{C},^{15}\text{N}$ -labeled protein. These methods are 1) the use of an adiabatic  $^{13}\text{C}$  inversion pulse optimized to selectively invert the protein protons (Zwahlen *et al.*, Eichmüller *et al.*); 2) the acquisition of 4 sub spectra and their subsequent addition/subtraction leading to 4 datasets containing distinct information (Slijper *et al.*). The experiment is detailed in Fig. S1-I.

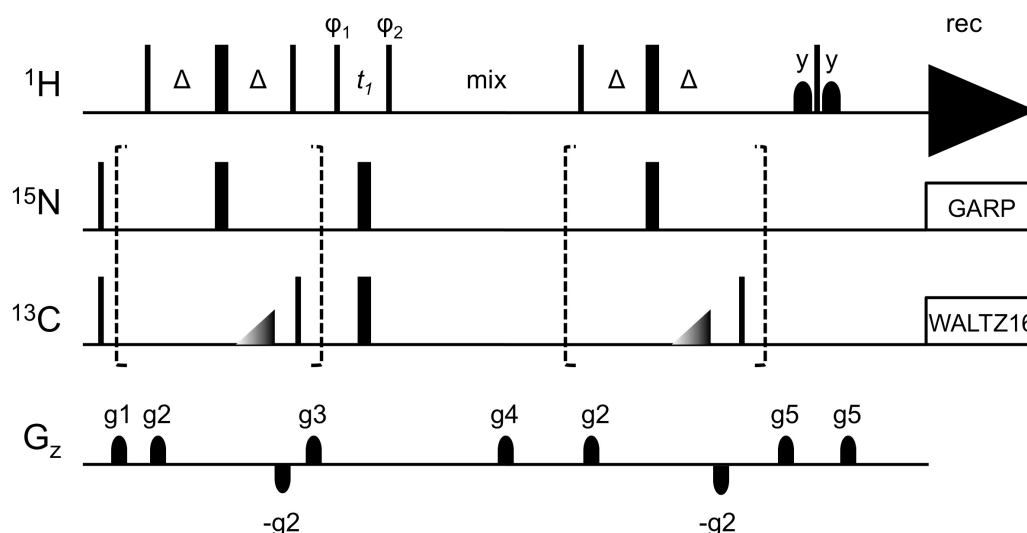

**Figure S1-I.** Pulse scheme for the simultaneous recording of intra- and intermolecular NOEs in protein ligand complexes. The half filters applied on the  $^{13}\text{C}$  and  $^{15}\text{N}$  are within brackets. Narrow and wide pulses indicate  $90^\circ$  and  $180^\circ$  pulses respectively. Unless indicated, all pulses are applied along the x-axis. Broadband  $^{13}\text{C}$  inversion (during  $\Delta$ ) is achieved using a WURST adiabatic pulse with a peak  $\gamma B_1 = 4.5$  kHz and with apodization of the first and last 30 % using a sine function, a 60 kHz frequency sweep, and a duration of 2.8 ms.  $^{13}\text{C}$  and  $^{15}\text{N}$  decoupling during acquisition were achieved with WALTZ16 ( $\gamma B_1 = 0.8$  kHz) and GARP ( $\gamma B_1 = 0.66$  kHz) decoupling scheme. The value for  $\Delta$  was 5.2 ms and the NOE mixing time was set to 150 ms. Gradient levels were as follows: g1=1.0 ms, 2.6  $\text{Gcm}^{-1}$ ; g2=1.2 ms, 2  $\text{Gcm}^{-1}$ ; g3=2.4 ms, 7  $\text{Gcm}^{-1}$ ; g4=2.0 ms, 8  $\text{Gcm}^{-1}$ ; g5=1.0 ms, 8  $\text{Gcm}^{-1}$ . The phase cycling was  $\varphi_1=(x,-x,-x,x,y,-y,-y,y)$ ;  $\varphi_2=(x,x,-x,-x,y,y,-y,-y)$  and receiver was  $(x,-x)$ . Quadrature detection in F1 is achieved by States-TPPI of  $\varphi_1$ .

Four sub spectra are recorded depending if the half filters are applied ([+]) or not ([−]): S1 : [−], [−]; S1 : [+], [−]; S1 : [−], [+]; S1 : [+], [+].

The linear combinations of this four sub spectra lead to four datasets. 2 datasets exhibiting either protein-protein (P→P) or ligand-ligand (L→L) intramolecular NOE, the 2 others carrying either protein-ligand (P→L) or ligand-protein (L→P) intermolecular NOE. The linear combinations are as follows:

|                     |   |   |   |         |
|---------------------|---|---|---|---------|
| S1 + S2 + S3 + S4 : | L | → | L | (intra) |
| S1 - S2 - S3 + S4 : | P | → | P | (intra) |
| S1 - S2 + S3 - S4 : | P | → | L | (inter) |
| S1 + S2 - S3 - S4 : | L | → | P | (inter) |

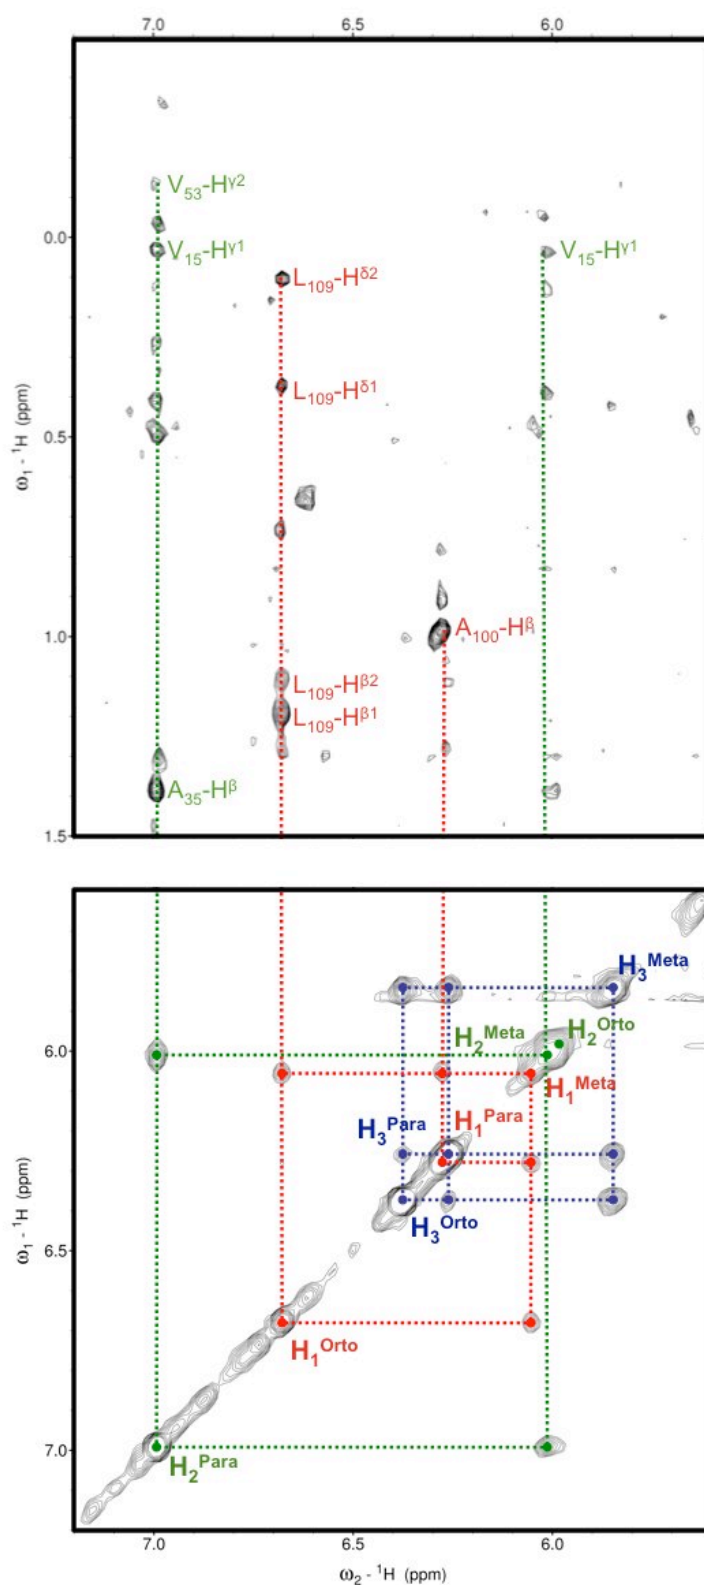

**Figure S1-II.** Doubly  $^{15}\text{N}/^{13}\text{C}$ -filtered  ${}^1\text{H}$ - ${}^1\text{H}$  NOESY experiment recorded on a  $\{^{13}\text{C},^{15}\text{N}\}\text{-Q83}/[\text{Ga}^{\text{III}}(\text{Ent})]^{3-}$  sample. Top frame: close-up of the P  $\rightarrow$  L intermolecular dataset. Bottom frame: close up on the L  $\rightarrow$  L intramolecular dataset.

**Supplement Table S3.** List of the Q83-[Ga<sup>III</sup>(Ent)]<sup>3-</sup> intermolecular contacts.

| Pocket I                                                            | Pocket II                                                          | Pocket III                                                        |
|---------------------------------------------------------------------|--------------------------------------------------------------------|-------------------------------------------------------------------|
| Ala <sub>100</sub> H <sup>β</sup> → H <sub>1</sub> <sup>Para</sup>  | Val <sub>15</sub> H <sup>γ1</sup> → H <sub>2</sub> <sup>Para</sup> | Trp <sub>62</sub> H <sup>ε</sup> → H <sub>3</sub> <sup>Meta</sup> |
| Leu <sub>109</sub> H <sup>N</sup> → H <sub>1</sub> <sup>Meta</sup>  | Val <sub>15</sub> H <sup>γ1</sup> → H <sub>2</sub> <sup>Meta</sup> | Trp <sub>62</sub> H <sup>ζ</sup> → H <sub>3</sub> <sup>Meta</sup> |
| Leu <sub>109</sub> H <sup>N</sup> → H <sub>1</sub> <sup>Orth</sup>  | Ala <sub>35</sub> H <sup>β</sup> → H <sub>2</sub> <sup>Para</sup>  | Ala <sub>81</sub> H <sup>β</sup> → H <sub>3</sub> <sup>Orth</sup> |
| Leu <sub>109</sub> H <sup>β1</sup> → H <sub>1</sub> <sup>Orth</sup> | Ala <sub>35</sub> H <sup>β</sup> → H <sub>2</sub> <sup>Meta</sup>  |                                                                   |
| Leu <sub>109</sub> H <sup>β2</sup> → H <sub>1</sub> <sup>Orth</sup> | Met <sub>36</sub> H <sup>N</sup> → H <sub>2</sub> <sup>Para</sup>  |                                                                   |
| Leu <sub>109</sub> H <sup>δ1</sup> → H <sub>1</sub> <sup>Orth</sup> | Met <sub>36</sub> H <sup>N</sup> → H <sub>2</sub> <sup>Meta</sup>  |                                                                   |
| Leu <sub>109</sub> H <sup>δ1</sup> → H <sub>1</sub> <sup>Meta</sup> | Ala <sub>52</sub> H <sup>N</sup> → H <sub>2</sub> <sup>Meta</sup>  |                                                                   |
| Leu <sub>109</sub> H <sup>δ2</sup> → H <sub>1</sub> <sup>Orth</sup> | Val <sub>53</sub> H <sup>γ2</sup> → H <sub>2</sub> <sup>Para</sup> |                                                                   |
| Leu <sub>109</sub> H <sup>δ2</sup> → H <sub>1</sub> <sup>Meta</sup> | Val <sub>53</sub> H <sup>γ2</sup> → H <sub>2</sub> <sup>Meta</sup> |                                                                   |
| His <sub>110</sub> H <sup>N</sup> → H <sub>1</sub> <sup>Orth</sup>  | Val <sub>53</sub> H <sup>γ2</sup> → H <sub>2</sub> <sup>Orth</sup> |                                                                   |
| Met <sub>111</sub> H <sup>N</sup> → H <sub>1</sub> <sup>Meta</sup>  |                                                                    |                                                                   |
| Met <sub>111</sub> H <sup>N</sup> → H <sub>1</sub> <sup>Orth</sup>  |                                                                    |                                                                   |
| Met <sub>111</sub> H <sup>ε</sup> → H <sub>1</sub> <sup>Meta</sup>  |                                                                    |                                                                   |
| Met <sub>111</sub> H <sup>ε</sup> → H <sub>1</sub> <sup>Orth</sup>  |                                                                    |                                                                   |

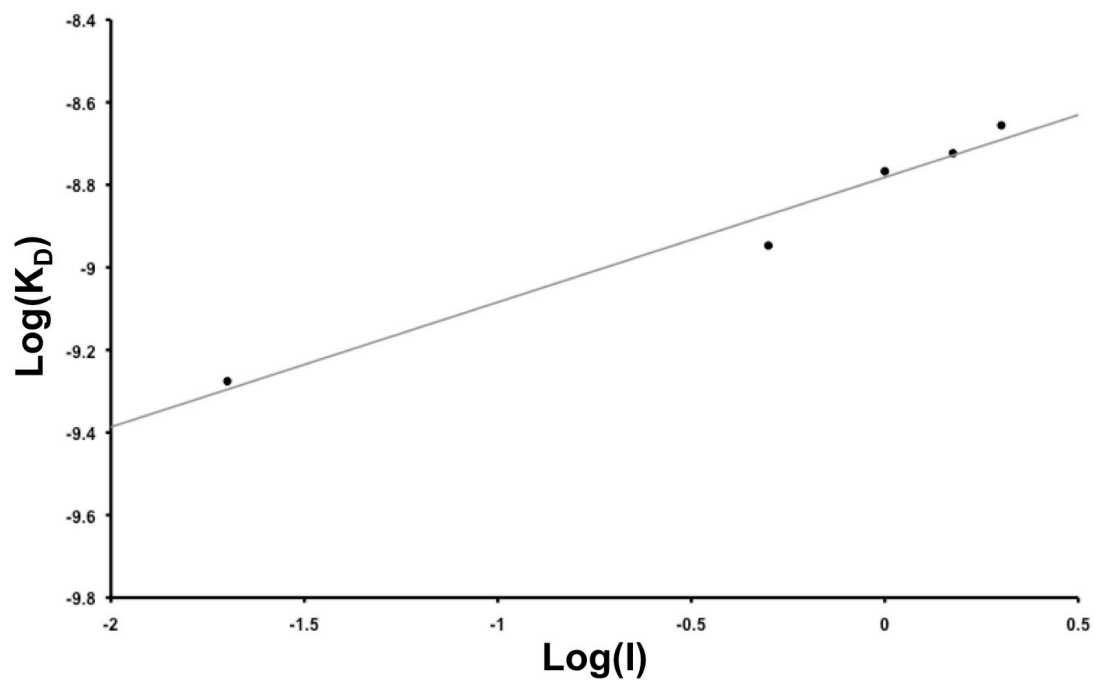

**Supplemental Figure S4.** Ionic strength dependency of Q83 affinity for  $[\text{Fe}^{\text{III}}(\text{Ent})]^{3-}$ . The affinity of Q83 for was measure by fluorescence quenching at different ionic strength (20 mM, 0.5 M, 1 M, 1.5 M and 2 M).

## REFERENCES TO SUPPLEMENTAL MATERIAL

- Zwahlen, C., Legault, P., Vincent, S., Greenblatt, J., Konrat, R., and Kay, L. E. (1997) *J. Am. Chem. Soc.* **119**, 6711-6721
- Eichmuller, C., Schuler, W., Konrat, R., and Krautler, B. (2001) *J. Biomol. NMR* **21**, 107-116
- Slijper, M., Kaptein, R., and Boelens, R. (1996) *J. Magn. Reson. B* **111**, 199-203
